# Supplementary material for: Systematic Review and Meta-Analysis of Damage Associated Molecular Patterns HMGB1 and S100B in Schizophrenia
Source: PubMed Central journal article supplement — Psychiatry Investig. 2022 Dec 22;19(12):981–90. doi: 10.30773/pi.2022.0173 (PMC9806506; doi:10.30773/pi.2022.0173), 2022-12-22
Supplement: pi-2022-0173-suppl1.pdf [file pi-2022-0173-suppl1.pdf]

**Supplementary Table 1.** Systematic review of S100B and HMGB1 levels in patients with schizophrenia and healthy controls

| Study                                      | N       | Sex (M/F) | Age (yr) | S100B concentration (ng/L)±SD | Diagnosis      | Location | Assay              | Psychopathological state                           | Sample medication                                                     | Sample characteristics                                                 | Illness duration (yr) | Control characteristics                                     |
|--------------------------------------------|---------|-----------|----------|-------------------------------|----------------|----------|--------------------|----------------------------------------------------|-----------------------------------------------------------------------|------------------------------------------------------------------------|-----------------------|-------------------------------------------------------------|
| <b>S100B</b>                               |         |           |          |                               |                |          |                    |                                                    |                                                                       |                                                                        |                       |                                                             |
| Chen et al., <sup>73</sup> (2017)          | Sample  | 62        | 24/38    | 35.31±11.61                   | DSM-4 (SCID)   | Serum    | ELISA              | PANSS: 83.32±10.17                                 | Drug naïve (N=34), drug free (N=28)                                   | All acute phase patients                                               | 3.9                   | Sex matched from local community                            |
|                                            | Control | 40        | 20/20    | 25.68±6.55                    |                |          |                    |                                                    |                                                                       |                                                                        |                       |                                                             |
| Dai et al., <sup>74</sup> (2020)           | Sample  | 83        | 45/38    | 23.65±6.9                     | DSM-4 (SCID)   | Serum    | ELISA              | PANSS: total not reported                          | All drug naïve                                                        | All first episode outpatients                                          | 0                     | Age and sex matched                                         |
|                                            | Control | 60        | 32/28    | 24.6±3.6                      |                |          |                    |                                                    |                                                                       |                                                                        |                       |                                                             |
| Gattaz et al., <sup>97</sup> (2000)        | Sample  | 23        | 16/7     | 36.0±9.0                      | DSM-4          | Plasma   | Luminometric assay | BPRS: 25.8±15.4, NSRS: 17.7±13.6                   | All medicated                                                         | All outpatients                                                        | 17±7                  | NS                                                          |
|                                            | Control | 23        | 16/7     | 44±17.0                       |                |          |                    |                                                    |                                                                       |                                                                        |                       |                                                             |
| Hendouei et al., <sup>75</sup> (2016)      | Sample  | 19        | 13/6     | 34.05±9.9                     | DSM-4-TR       | Serum    | ELISA              | PANSS: 85.3±24                                     | All medicated clozapine (N=6), risperidone (N=13)                     | All inpatients.                                                        | 9.4±9.41              | Age, gender, and BMI matched                                |
|                                            | Control | 25        | 18/7     | 34.2±8.30                     |                |          |                    |                                                    |                                                                       |                                                                        |                       |                                                             |
| Hong et al., <sup>76</sup> (2016)          | Sample  | 41        | 18/23    | 37.0±11.30                    | ICD-10         | Plasma   | ELISA              | PANSS: 80.29±29 9.22                               | All drug free ≥1 week prior to enrolment.                             | All inpatients                                                         | 11.6±8.93             | Age and sex matched staff member and medical students       |
|                                            | Control | 33        | 10/23    | 35.15±13.72                   |                |          |                    |                                                    |                                                                       |                                                                        |                       |                                                             |
| Kozłowska et al., <sup>45</sup> (2021)     | Sample  | 68        | 45/23    | 38.5±10.7                     | DSM-4 & ICD-10 | Serum    | ELISA              | PANSS 65.20±15.80 CDSS: 2.76±3.38                  | All medicated: CAED: 746.5±642.2                                      | All outpatients with chronic paranoid schizophrenia                    | NS                    | Age and sex matched from the local community                |
|                                            | Control | 29        | 19/10    | 37.6±10.6                     |                |          |                    |                                                    |                                                                       |                                                                        |                       |                                                             |
| Lara et al., <sup>77</sup> (2001)          | Sample  | 20        | 13/7     | 31±8                          | DSM-4          | Serum    | Luminometric assay | PANSS: 107±29                                      | All drug free ≥1 week prior to commencement                           | Inpatients (N=14), outpatients (N=6)                                   | NS                    | Age and sex matched                                         |
|                                            | Control | 20        | 13/7     | 31±9                          |                |          |                    |                                                    |                                                                       |                                                                        |                       |                                                             |
| Ling et al., <sup>78</sup> (2007)          | Sample  | 57        | 27/30    | 33.5±11.3                     | DSM-4 & ICD-10 | Plasma   | ELISA              | PANSS: 77.8±13                                     | All drug free ≥2 weeks prior to blood draw.                           | All inpatients                                                         | 8.00±9.01             | Age and sex matched volunteers from hospital staff          |
|                                            | Control | 60        | 30/30    | 34.9±6.68                     |                |          |                    |                                                    |                                                                       |                                                                        |                       |                                                             |
| Milleit et al., <sup>79</sup> (2016)       | Sample  | 17        | 6/11     | 33.9±9.7                      | DSM-4          | Serum    | Luminometric assay | PANSS: total NS                                    | Drug naïve (N=10), unmedicated ≥4 days (N=7)                          | All inpatients                                                         | NS                    | NS                                                          |
|                                            | Control | 22        | 9/13     | 34.7±10.3                     |                |          |                    |                                                    |                                                                       |                                                                        |                       |                                                             |
| Morera-Fumero et al., <sup>80</sup> (2017) | Sample  | 65        | 36/29    | 36.7 ± 10.2                   | DSM-4          | Serum    | ELISA              | PANSS: total NS                                    | Mostly medicated CAED: 757.7±400.0                                    | All inpatients with acute psychotic relapse                            | 12.3 ±10.0            | Age and sex matched from research institute and colleagues. |
|                                            | Control | 65        | 46/19    | 39.6 ± 9.8                    |                |          |                    |                                                    |                                                                       |                                                                        |                       |                                                             |
| O'Connell et al., <sup>98</sup> (2013)     | Sample  | 97        | 68/29    | 45 ± 12.2                     | DSM-4-TR       | Serum    | ELISA              | BPRS: 31±9 SANS: 34±18                             | All medicated. CAED: 864 mg/d                                         | All inpatients                                                         | NS                    | Age and sex matched from the same demographic               |
|                                            | Control | 27        | 10/17    | 42.4 ± 10.3                   |                |          |                    |                                                    |                                                                       |                                                                        |                       |                                                             |
| Qi et al., <sup>81</sup> (2009)            | Sample  | 63        | 43/20    | 50.8 ± 6.8                    | DSM-4          | Serum    | ELISA              | PANSS: 59.8±13.1                                   | All medicated. CAED:458±529 mg/d                                      | All chronic schizophrenia inpatients                                   | 25.4±7.2              | Age and gender matched from local community                 |
|                                            | Control | 50        | 29/21    | 49.6 ± 5.5                    |                |          |                    |                                                    |                                                                       |                                                                        |                       |                                                             |
| Rothermundt et al., <sup>82</sup> (2001)   | Sample  | 26        | 10/16    | 37.0±12.9                     | DSM-4          | Serum    | Luminometric assay | PANSS: 86.7±17.9                                   | Drug free ≥6 months prior to commencement                             | All acute stage inpatients                                             | 9.96±10.35            | Age and sex matched                                         |
|                                            | Control | 26        | 10/16    | 37.0±12.9                     |                |          |                    |                                                    |                                                                       |                                                                        |                       |                                                             |
| Rothermundt et al., <sup>83</sup> (2004a)  | Sample  | 21        | 17/4     | 32.5±13.0                     | DSM-4          | Serum    | Luminometric assay | PANSS: 97.7±25.6                                   | Drug naïve (N=16), unmedicated ≥6 months (N=5)                        | All Inpatients. Acute episode inpatient (N=4)                          | NS                    | Age and sex matched from blood donation centre              |
|                                            | Control | 21        | 17/4     | 32.2±11.8                     |                |          |                    |                                                    |                                                                       |                                                                        |                       |                                                             |
| Rothermundt et al., <sup>84</sup> (2004b)  | Sample  | 98        | 56/42    | 42.1±11.1                     | ICD-10         | Serum    | Luminometric assay | PANSS: 82.5±17.1                                   | Drug free ≥1 week prior to commencement                               | All chronic schizophrenia patients with primarily negative symptoms    | NS.                   | Age and sex matched                                         |
|                                            | Control | 98        | 56/42    | 42.1±11.1                     |                |          |                    |                                                    |                                                                       |                                                                        |                       |                                                             |
| Rothermundt et al., <sup>85</sup> (2007)   | Sample  | 12        | 11/1     | 25.33±4.75                    | DSM-4 (SCID)   | Serum    | Luminometric assay | PANSS: 81±19.9                                     | Drug naïve (N=9), Medicated (N=2)                                     | All inpatients.                                                        | 1.1 ± 1.3             | Age and sex matched.                                        |
|                                            | Control | 12        | 11/1     | 25.33±4.75                    |                |          |                    |                                                    |                                                                       |                                                                        |                       |                                                             |
| Kim et al., <sup>86</sup> (2007)           | Sample  | 60        | NS       | 37.0±3.5                      | DSM-4          | Serum    | Luminometric assay | PANSS: Total NS                                    | Drug free (N=30) Medicated (N=30)                                     | All inpatients.                                                        | 15.0 ± 6.7            | Age and sex matched.                                        |
|                                            | Control | 30        | 13/17    | 37.0±3.5                      |                |          |                    |                                                    |                                                                       |                                                                        |                       |                                                             |
| Šakić et al., <sup>87</sup> (2016)         | Sample  | 65        | 55/10    | 41.96±13.2                    | DSM-4-TR       | Serum    | ELISA              | PANSS: 89.35±25.46                                 | Drug naïve (N=12), Drug free ≥ 30 days (N=5), Medicated (N=48)        | All inpatients.                                                        | 1.7 ± 0.65            | Age and sex matched.                                        |
|                                            | Control | 70        | 51/18    | 43.2±12.4                     |                |          |                    |                                                    |                                                                       |                                                                        |                       |                                                             |
| Sarandol et al., <sup>88</sup> (2007)      | Sample  | 40        | 18/22    | 34.9±9.9                      | DSM-4          | Serum    | ELISA              | SANS: 53.5±26.6, SAPS: 42.2± 21.3, BPRS: 42.2±21.3 | Drug naïve (N=9), medication free ≥3 weeks prior to blood draw (N=31) | Inpatients (N=35) and outpatients (N=5)                                | 6.73±6.3              | Age and sex matched from hospital staff                     |
|                                            | Control | 35        | 17/18    | 33.5±9.2                      |                |          |                    |                                                    |                                                                       |                                                                        |                       |                                                             |
| Schmitt et al., <sup>89</sup> (2005)       | Sample  | 41        | 24/17    | 63.3±7.0                      | DSM-4          | Serum    | Luminometric assay | SANS: 45.6±22.7, SAPS: 44.3±27.9, BPRS: 46.2±14.9  | All medicated. CAED: 708±591.7                                        | All inpatients with chronic schizophrenia                              | 35.3±11.4             | Age and sex matched                                         |
|                                            | Control | 23        | 15/8     | 64±9.8                        |                |          |                    |                                                    |                                                                       |                                                                        |                       |                                                             |
| Schroeter et al., <sup>90</sup> (2003)     | Sample  | 30        | 14/16    | 34.8±12.4                     | DSM-4 & ICD-10 | Serum    | Luminometric assay | BPRS: 43.5±12.6                                    | Drug free (N=14), medicated (N=16) CAED: 363.1±248.8                  | All inpatients with chronic schizophrenia                              | 8.9±8.8               | Age and sex matched from hospital staff                     |
|                                            | Control | 15        | 8/7      | 34.2±5.6                      |                |          |                    |                                                    |                                                                       |                                                                        |                       |                                                             |
| Schroeter et al., <sup>52</sup> (2009)     | Sample  | 20        | 9/11     | 34.6±12.7                     | DSM-4 & ICD-10 | Serum    | Luminometric assay | BPRS: 47.6±11.9                                    | Drug free (N=5), medicated (N=15)                                     | All inpatients                                                         | 8.4±9.6               | Age and sex matched from hospital                           |
|                                            | Control | 19        | 10/9     | 37.9±10.2                     |                |          |                    |                                                    |                                                                       |                                                                        |                       |                                                             |
| Steiner et al., <sup>91</sup> (2006)       | Sample  | 12        | 7/5      | 24.0±7.0                      | DSM-4          | Serum    | Luminometric assay | PANSS: 87±15                                       | Medicated (N=12)                                                      | All inpatients with first onset paranoid schizophrenia                 | 1.75±0.9              | Age and sex matched from cohort experiencing migraine       |
|                                            | Control | 17        | 9/8      | 25.0±8.0                      |                |          |                    |                                                    |                                                                       |                                                                        |                       |                                                             |
| Steiner et al., <sup>92</sup> (2010)       | Sample  | 26        | 17/9     | 34.7±11.3                     | DSM-4          | Serum    | ELISA              | PANSS: 84.8±11.2                                   | Medicated (N=15), medication free ≥6 weeks prior to enrolment (N=11)  | All inpatients with acute onset schizophrenia                          | 8±9                   | NS                                                          |
|                                            | Control | 32        | 20/12    | 34.4±10.8                     |                |          |                    |                                                    |                                                                       |                                                                        |                       |                                                             |
| Uzbay et al., <sup>93</sup> (2013)         | Sample  | 18        | 11/7     | 37.4±3.0                      | DSM-4          | Plasma   | ELISA              | PANSS: 87.17±3.13                                  | All drug free ≥26 weeks                                               | All inpatients: first episode inpatients (N=6)                         | 9.83±2.37             | NS                                                          |
|                                            | Control | 19        | 11/8     | 33.9±1.4                      |                |          |                    |                                                    |                                                                       |                                                                        |                       |                                                             |
| Wiesmann et al., <sup>94</sup> (1999)      | Sample  | 20        | 8/12     | 35.7±10.7                     | DSM-4 & ICD-10 | Plasma   | Luminometric assay | PANSS: total NS                                    | All medicated                                                         | All inpatients                                                         | 8.3±1.1               | Age and gender matched                                      |
|                                            | Control | 20        | NS       | 35.7±10.7                     |                |          |                    |                                                    |                                                                       |                                                                        |                       |                                                             |
| Xiong et al., <sup>95</sup> (2014)         | Sample  | 278       | 170/108  | 34.2±10.5                     | DSM-4-TR       | Serum    | ELISA              | PANSS: 70.6±15.8                                   | Drug naïve (N= 84), medicated (N=194)                                 | Commonest subtypes were paranoid (N=161) & residual (N=60)             | 1.8±2.1               | Age, sex, and BMI matched                                   |
|                                            | Control | 260       | 170/90   | 30.6±6.33                     |                |          |                    |                                                    |                                                                       |                                                                        |                       |                                                             |
| Zhang et al., <sup>96</sup> (2010)         | Sample  | 162       | 99/63    | 40.1±8.3                      | DSM-4 (SCID)   | Serum    | ELISA              | PANSS: 70.8                                        | Drug naïve (N=80), medicated (N=82)                                   | All inpatients. Early stage (N=80) and chronic, (N=82) disease courses | 14.5±8.8              | Recruited from local community                              |
|                                            | Control | 97        | 59/38    | 37.9±9.0                      |                |          |                    |                                                    |                                                                       |                                                                        |                       |                                                             |
| <b>HMGB1</b>                               |         |           |          |                               |                |          |                    |                                                    |                                                                       |                                                                        |                       |                                                             |
| Kozłowska et al., <sup>45</sup> (2021)     | Sample  | 68        | 45/23    | 38.5±10.7                     | DSM-4 & ICD-10 | Serum    | ELISA              | PANSS: 65.20±15.80, CDSS: 2.76±3.38                | All medicated. CAED: 746.5±642.2                                      | All outpatient with chronic, paranoid schizophrenia.                   | NS                    | Age and sex matched from the local community                |
|                                            | Control | 29        | 19/10    | 37.6±10.6                     |                |          |                    |                                                    |                                                                       |                                                                        |                       |                                                             |
| Mousa et al., <sup>46</sup> (2021)         | Sample  | 115       | 78/37    | 36.3±11.0                     | DSM-4-TR       | Serum    | ELISA              | SANS: 73.1±14.7                                    | All medicated. CAED: 761.0±267.1                                      | 55 partial responders to treatment, 60 non responders                  | NS                    | Recruited from local community                              |
|                                            | Control | 43        | 24/19    | 33.2±11.1                     |                |          |                    |                                                    |                                                                       |                                                                        |                       |                                                             |
| Yilmaz et al., <sup>47</sup> (2021)        | Sample  | 59        | 40/19    | 38.0±7.7                      | DSM-5          | Serum    | ELISA              | SANS: 19.3±7.9, BPRS: 13.5±7.8                     | All medicated                                                         | 30 inpatients, 29 outpatients                                          | 10.6±6.0              | Age and sex matched healthy controls                        |
|                                            | Control | 15        | 9/6      | 33.3±8.2                      |                |          |                    |                                                    |                                                                       |                                                                        |                       |                                                             |

This table depicts the patient characteristics, sample source, assays, medication and levels of DAMPs for each study listed. Age, age in years; BPRS, Brief Psychiatric Rating Scale; CAED, Chlorpromazine antipsychotic equivalent dose (mg/day); CDSS, Calagry Depression Scale for Schizophrenia; Control, healthy controls; DSM, Diagnostic and Statistics Manual of Mental Disorders; ELISA, enzyme linked immunosorbent assay; ICD, International Classification of Disease; Location, sample isolated from; NS, not stated; NSRS, Negative Symptom Rating Scale; PANSS, The Positive and Negative Symptom Scale; SANS, Scale for assessment of Negative Symptoms; SAPS, Scale for assessment of Positive Symptoms; SCID, Structured Clinical Interview for DSM; Sample, individuals diagnosed with schizophrenia; Sex M/F, number of males and females; TR, text revision; SD, standard deviation
